# Supplementary material for: Influence of Alcohol Consumption on the Development of Erosive Esophagitis in Both Sexes: A Longitudinal Study
Source: MDPI journal article supplement (doi:10.3390/nu14224760), 2022-11-10
Supplement: s1 [file s1]

## Supplementary Information S1

### Evaluation of *Helicobacter pylori* infection

Serological *H. pylori* status was assessed using an enzyme-linked immunosorbent assay (Eiken Chemical, Tokyo, Japan). The seropositive antibody titer threshold for *H. pylori* infection was set to at least 3 U/mL. An increase in  $\Delta^{13}\text{C}$  values of  $>2.5\text{‰}$  in the urea breath test (UBT) indicated positive results. Non-*H. pylori* infection was defined as follows: (1) patients *with H. pylori* antibody seronegativity and/or UBT negativity and no endoscopically atrophic gastritis; (2) those who did not undergo *H. pylori* antibody test or UBT, had no history of eradication therapy, had endoscopically regular arrangement of collecting venules, and the absence of atrophic gastritis; and (3) those with a history of eradication therapy and confirmed for the absence of *H. pylori* using UBT. We instituted a strict definition of non-*H. pylori* infection; therefore, individuals not fulfilling the above criteria were defined to have *H. pylori* infection.

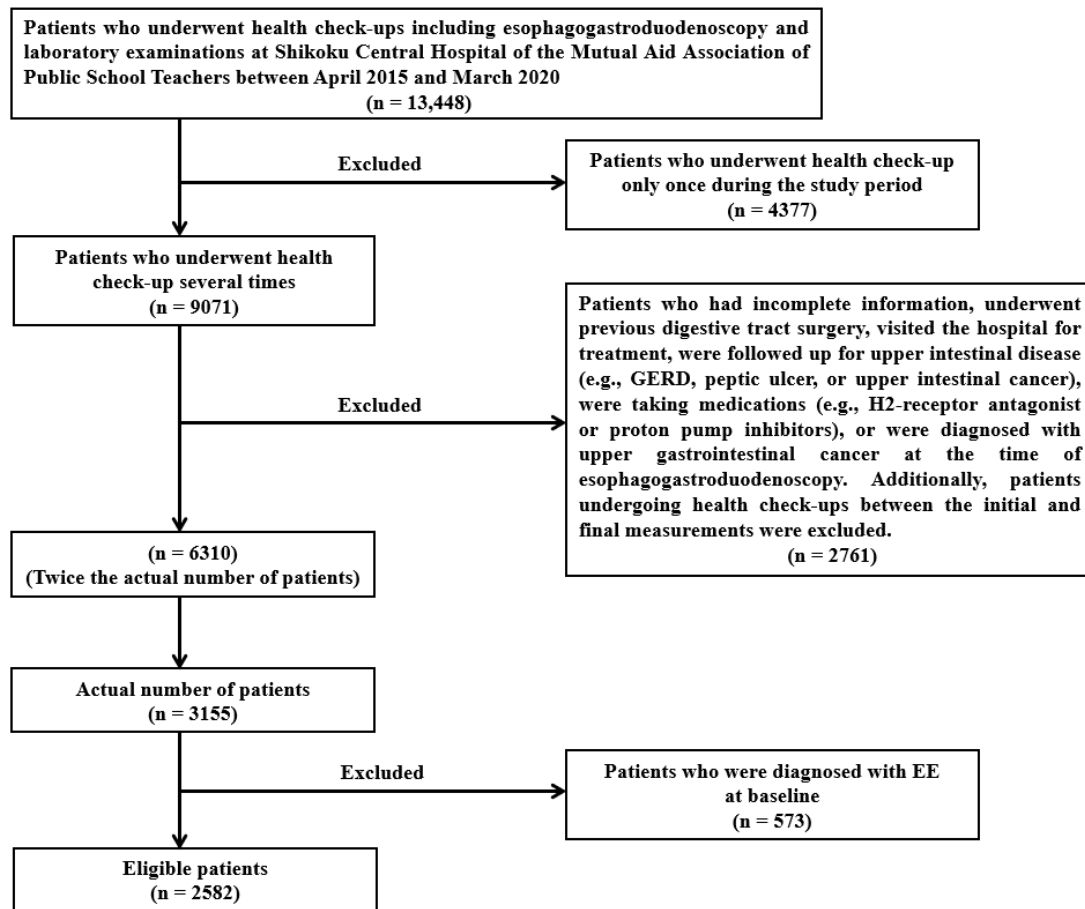

**Figure S1.** Participant flow diagram of individuals undergoing health check-ups. EE, erosive esophagitis; GERD, gastroesophageal reflux disease.

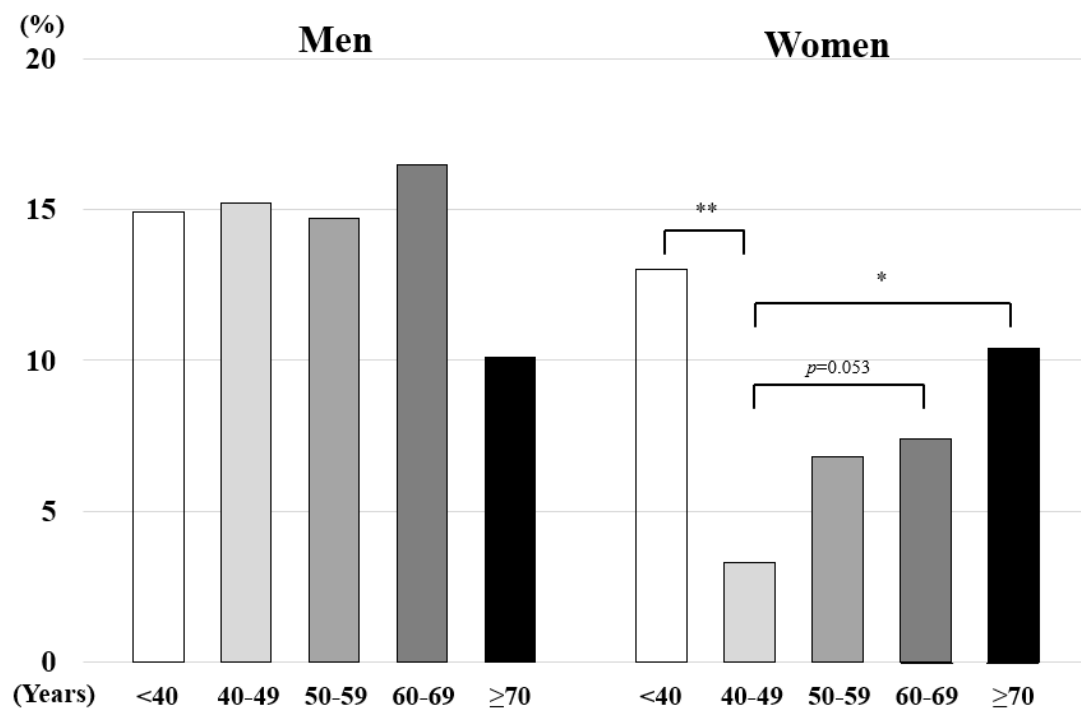

**Figure S2.** Comparison across age groups of the prevalence of EE development according to sex.

\* $p < 0.05$ , \*\* $p < 0.01$ . EE, erosive esophagitis.

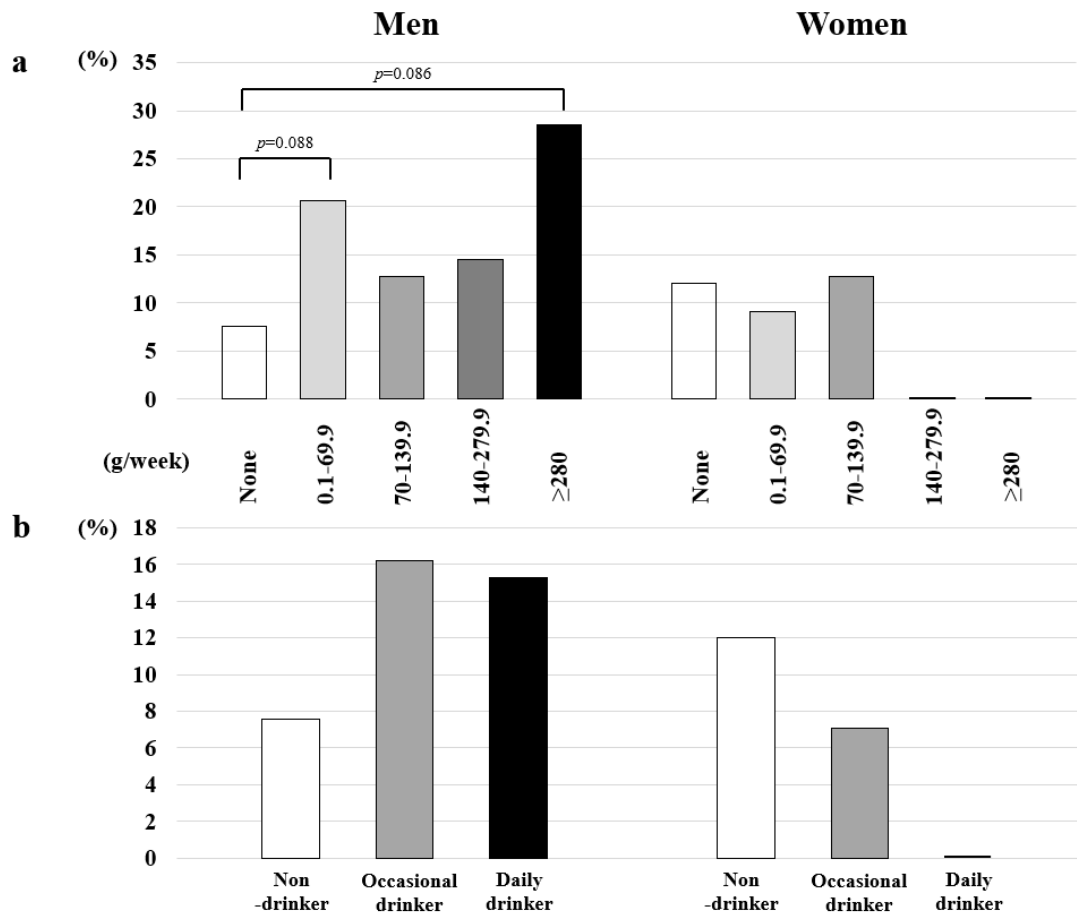

**Figure S3.** (a) Prevalence of severe EE according to drinking quantity categories and sex. EE, erosive esophagitis. (b) Prevalence of severe EE according to drinking frequency categories and sex. EE, erosive esophagitis.

**Table S1** Relationship between alcohol quantity and EE severity according to sex (n = 290)

| Men (n = 211)             |           | Severity of EE |           |          |          |
|---------------------------|-----------|----------------|-----------|----------|----------|
| Alcohol quantity (g/week) |           | Grade A        | Grade B   | Grade C  | Grade D  |
| None                      | 52 (100%) | 48 (92.3%)     | 2 (3.8%)  | 2 (3.8%) | 0 (0%)   |
| 0.1–69.9                  | 29 (100%) | 23 (79.3%)     | 6 (20.7%) | 0 (0%)   | 0 (0%)   |
| 70–139.9                  | 47 (100%) | 41 (87.2%)     | 5 (10.6%) | 1 (2.1%) | 0 (0%)   |
| 140–279.9                 | 76 (100%) | 65 (85.5%)     | 9 (11.8%) | 1 (1.3%) | 1 (1.3%) |
| ≥280                      | 7 (100%)  | 5 (71.4%)      | 2 (28.6%) | 0 (0%)   | 0 (0%)   |
| Women (n = 79)            |           | Severity of EE |           |          |          |
| Alcohol quantity (g/week) |           | Grade A        | Grade B   | Grade C  | Grade D  |
| None                      | 50 (100%) | 44 (88.0%)     | 6 (12.0%) | 0 (0%)   | 0 (0%)   |
| 0.1–69.9                  | 11 (100%) | 10 (90.9%)     | 1 (9.1%)  | 0 (0%)   | 0 (0%)   |
| 70–139.9                  | 6 (100%)  | 41 (87.2%)     | 5 (10.6%) | 0 (0%)   | 0 (0%)   |
| 140–279.9                 | 11 (100%) | 11 (100%)      | 0 (0%)    | 0 (0%)   | 0 (0%)   |
| ≥280                      | 1 (100%)  | 1 (100%)       | 0 (0%)    | 0 (0%)   | 0 (0%)   |

EE, erosive esophagitis

**Table S2** Relationship between drinking frequency and the severity of EE according to sex (n = 290)

| Men (n = 211)       |           | Severity of EE |            |          |          |
|---------------------|-----------|----------------|------------|----------|----------|
| Drinking frequency  |           | Grade A        | Grade B    | Grade C  | Grade D  |
| Non-drinking        | 52 (100%) | 48 (92.3%)     | 2 (3.8%)   | 2 (3.8%) | 0 (0%)   |
| Occasional drinking | 74 (100%) | 62 (83.8%)     | 12 (16.2%) | 0 (0%)   | 0 (0%)   |
| Daily drinking      | 85 (100%) | 72 (84.7%)     | 10 (11.8%) | 2 (2.4%) | 1 (1.2%) |
| Women (n = 79)      |           | Severity of EE |            |          |          |
| Drinking frequency  |           | Grade A        | Grade B    | Grade C  | Grade D  |
| Non-drinking        | 50 (100%) | 44 (88.0%)     | 6 (12.0%)  | 0 (0%)   | 0 (0%)   |
| Occasional drinking | 14 (100%) | 13 (92.9%)     | 1 (7.1%)   | 0 (0%)   | 0 (0%)   |
| Daily drinking      | 15 (100%) | 15 (100%)      | 0 (0%)     | 0 (0%)   | 0 (0%)   |

EE, erosive esophagitis

**Table S3** Odds ratio for the development of EE in each category of alcohol quantity and other factors

|                             |                      | Men                 |                     |                     | Women               |                     |                     |
|-----------------------------|----------------------|---------------------|---------------------|---------------------|---------------------|---------------------|---------------------|
|                             |                      | Overall             | <50 years           | ≥50 years           | Overall             | <50 years           | ≥50 years           |
| Age                         | (years)              | 1.017 (1.000–1.035) | 1.052 (0.992–1.116) | 1.035 (1.007–1.065) | 1.026 (0.990–1.063) | 0.975 (0.865–1.099) | 1.057 (1.009–1.108) |
| BMI                         | (kg/m <sup>2</sup> ) | 1.094 (0.994–1.203) | 0.999 (0.843–1.184) | 1.140 (1.011–1.285) | 1.045 (0.915–1.193) | 0.977 (0.759–1.259) | 1.077 (0.919–1.262) |
| WC                          | (cm)                 | 0.991 (0.956–1.029) | 1.045 (0.975–1.120) | 0.969 (0.928–1.012) | 1.005 (0.958–1.054) | 1.007 (0.924–1.096) | 1.001 (0.947–1.059) |
| Current smokers             |                      | 1.373 (0.998–1.888) | 1.249 (0.722–2.159) | 1.449 (0.976–2.151) | 1.007 (0.283–3.591) | (–)                 | 1.953 (0.474–7.994) |
| Drinkers                    |                      | 1.252 (0.907–1.726) | 2.312 (1.171–4.564) | 1.009 (0.694–1.466) | 1.078 (0.666–1.747) | 1.764 (0.736–4.231) | 0.853 (0.461–1.581) |
| Alcohol quantity            | (g/week)             |                     |                     |                     |                     |                     |                     |
|                             | 0.1–69.9             | 0.971 (0.609–1.547) | 1.154 (0.461–2.885) | 0.989 (0.572–1.709) | 0.692 (0.353–1.356) | 1.072 (0.328–3.505) | 0.589 (0.253–1.370) |
|                             | 70–139.9             | 1.443 (0.954–2.182) | 2.878 (1.302–6.361) | 1.134 (0.682–1.883) | 0.911 (0.375–2.210) | 1.873 (0.481–7.299) | 0.619 (0.182–2.110) |
|                             | 140–279.9            | 1.255 (0.875–1.799) | 2.666 (1.283–5.542) | 0.945 (0.621–1.438) | 3.040 (1.504–6.146) | 3.074 (0.940–10.05) | 3.149 (1.230–8.064) |
|                             | ≥280                 | 2.014 (0.848–4.787) | 4.549 (1.228–16.85) | 1.227 (0.354–4.255) | 13.26 (1.735–101.4) | 30.87 (3.693–258.1) | (–)                 |
| Regular exercise            |                      | 1.028 (0.754–1.400) | 1.330 (0.777–2.277) | 0.897 (0.609–1.321) | 1.005 (0.590–1.714) | 0.282 (0.035–2.279) | 1.146 (0.629–2.088) |
| Eating before going to bed  |                      | 1.228 (0.917–1.643) | 1.256 (0.759–2.078) | 1.269 (0.874–1.841) | 0.851 (0.492–1.472) | 0.943 (0.381–2.334) | 0.776 (0.371–1.621) |
| Custom of having breakfast  |                      | 0.857 (0.535–1.373) | 0.634 (0.301–1.338) | 1.048 (0.569–1.929) | 0.597 (0.233–1.528) | 0.360 (0.088–1.475) | 0.724 (0.202–2.594) |
| Hypertension                |                      | 1.044 (0.757–1.441) | 0.719 (0.412–1.254) | 1.293 (0.853–1.959) | 1.140 (0.683–1.903) | 1.820 (0.728–4.550) | 0.934 (0.496–1.760) |
| Dyslipidemia                |                      | 0.883 (0.649–1.201) | 0.689 (0.385–1.231) | 0.985 (0.681–1.424) | 1.397 (0.803–2.431) | 2.081 (0.731–5.924) | 1.226 (0.645–2.331) |
| IGT                         |                      | 1.373 (1.010–1.882) | 1.480 (0.849–2.578) | 1.263 (0.861–1.853) | 1.204 (0.728–1.992) | 1.804 (0.690–4.716) | 1.070 (0.599–1.911) |
| <i>H. pylori</i> positivity |                      | 0.266 (0.151–0.471) | 0.073 (0.011–0.500) | 0.358 (0.193–0.665) | 0.242 (0.076–0.771) | 0.403 (0.068–2.382) | 0.190 (0.046–0.790) |

Data are presented as odds ratio and 95% confidence interval. (–) means including the absence of participants in category.

BMI, body mass index; EE, erosive esophagitis; *H. pylori*, *Helicobacter pylori*; IGT, impaired glucose tolerance; WC, waist circumference
